RESEARCH ARTICLE

# Using Graph Components Derived from an Associative Concept Dictionary to Predict fMRI Neural Activation Patterns that Represent the Meaning of Nouns

Hiroyuki Akama<sup>1\*</sup>, Maki Miyake<sup>2</sup>, Jaeyoung Jung<sup>1</sup>, Brian Murphy<sup>3‡</sup>

**1** Graduate School of Decision Science and Technology, Tokyo Institute of Technology, Tokyo, Japan, **2** Graduate School of Language and Culture, Osaka University, Osaka, Japan, **3** Machine Learning Department, Carnegie Mellon University, Pittsburgh, United States of America

‡ Current address: School of Electronics, Electrical Engineering and Computer Science, Queen's University, Belfast, United Kingdom

\* [akama.h.aa@m.titech.ac.jp](mailto:akama.h.aa@m.titech.ac.jp)

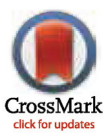

OPEN ACCESS

**Citation:** Akama H, Miyake M, Jung J, Murphy B (2015) Using Graph Components Derived from an Associative Concept Dictionary to Predict fMRI Neural Activation Patterns that Represent the Meaning of Nouns. PLoS ONE 10(4): e0125725. doi:10.1371/journal.pone.0125725

**Academic Editor:** Thomas Wennekers, Plymouth University, UNITED KINGDOM

**Received:** December 5, 2014

**Accepted:** March 18, 2015

**Published:** April 30, 2015

**Copyright:** © 2015 Akama et al. This is an open access article distributed under the terms of the [Creative Commons Attribution License](http://creativecommons.org/licenses/by/4.0/), which permits unrestricted use, distribution, and reproduction in any medium, provided the original author and source are credited.

**Data Availability Statement:** All relevant data are within the paper and its Supporting Information files.

**Funding:** This work was supported by 1) Grants-in-Aid for Scientific Research ("KAKENHI", <http://www.jsps.go.jp/english/e-grants/index.html>), Japan Society for the Promotion of Science (JSPS) (<http://kaken.nii.ac.jp/en/>), and Kiban (C)-26330246 for data analysis and preparation of the manuscript; and 2) Research Administration Center, Tokyo Institute of Technology (<http://www.rac.titech.ac.jp/english/>) for English proofreading (1–129). The funders had no role in the

## Abstract

In this study, we introduce an original distance definition for graphs, called the Markov-inverse-F measure (MiF). This measure enables the integration of classical graph theory indices with new knowledge pertaining to structural feature extraction from semantic networks. MiF improves the conventional Jaccard and/or Simpson indices, and reconciles both the geodesic information (random walk) and co-occurrence adjustment (degree balance and distribution). We measure the effectiveness of graph-based coefficients through the application of linguistic graph information for a neural activity recorded during conceptual processing in the human brain. Specifically, the MiF distance is computed between each of the nouns used in a previous neural experiment and each of the in-between words in a sub-graph derived from the Edinburgh Word Association Thesaurus of English. From the MiF-based information matrix, a machine learning model can accurately obtain a scalar parameter that specifies the degree to which each voxel in (the MRI image of) the brain is activated by each word or each principal component of the intermediate semantic features. Furthermore, correlating the voxel information with the MiF-based principal components, a new computational neurolinguistics model with a network connectivity paradigm is created. This allows two dimensions of context space to be incorporated with both semantic and neural distributional representations.

## Introduction

Complex networks are frequently represented in the form of graphs consisting of nodes (vertices) denoting individual (or atomic) entities, and edges that link them according to information about semantic attributes or some weighting value. Graph coefficients have a long history,

study design, data collection and analysis, decision to publish, or preparation of the manuscript.

**Competing Interests:** The authors have declared that no competing interests exist.

especially in well-developed social networks, such as the Jaccard or Simpson indexes. In cognitive linguistics and psychology, a network view can be applied to the world of language, and conceptual interrelations can be represented in graph form as a semantic network. Word association norms representing the relationship between words are a traditional and conventional object of research—such associations have undoubtedly served as valuable language resources in the construction of semantic networks.

Since the work of Galton, word association [1–4] has been used as an empirical method for observing thought processes, memory, and mental states in clinical and cognitive psychology [5–10]. Associative Concept Dictionaries (ACDs) consist of word-pair data from psychological experiments in which participants provide a semantically related response word to the given stimulus word [11–15].

At the start of the 21<sup>st</sup> century, advanced techniques involving complex networks began to be applied to language corpora to enhance lexical semantic analysis. Dorow et al. [16] utilised graph clustering techniques to detect lexical ambiguity and acquire semantic classes. Tenenbaum and Steyvers [17] conducted a noteworthy study that examined the structural features of three semantic networks (the free association norms of Nelson et al., Roget's thesaurus, and WordNet). Rising interest in complex networks is rooted in the work of Watts and Strogatz [18] and Ferrer i Cancho and Sole [19], who elucidated the “small-world” phenomenon, and especially that of Barabási and Albert [20], who suggested that the degree distributions of scale-free network structures obey a power law.

A new similarity coefficient that integrates the classical indices of graph theory with new knowledge pertaining to structural feature extraction from semantic networks represents an important advance. In addition, as there are few objective methods for treating network similarity information in the domain of corpus analysis and psychological experimentation (aside from Word Association Space [21], for example), machine learning methods in neurolinguistics may provide a new means of evaluation for semantic network computing [22–25]. Note that, despite the significance of semantic networks built on word association norms in cognitive science and psychology, no attempt has yet been made to apply any linguistic graph information to human neural activity data recorded during conceptual processing.

This idea has great potential in light of a study reported by Mitchell et al. [26] using a large corpus of web text (the Google Web 1T 5-gram Collection). They proposed a computational model that allows the functional magnetic resonance imaging (fMRI) activity associated with thinking about arbitrary nouns to be predicted. The underlying theory is that the neural basis of the semantic representation of specific nouns is related to the distributional properties of those words in a broad-based corpus. Recently, the model of Mitchell et al. has been extended to use crowd-sourced judgments of semantic properties [27] or broader corpora [28–31].

From this perspective, a *computational neurolinguistics* model that utilises graph theory might be feasible if we could create a set of intermediate semantic features (and their weights) by applying appropriate graph coefficients for complex networks built from a small dataset of word association norms. Computational neurolinguistics is an emerging research area that aims to integrate computational linguistics and cognitive neuroscience to better understand word semantics. It takes advantage of machine learning methods to mediate datasets from neural recordings and language corpora (cf. <https://sites.google.com/site/compneurowsnaacl10/>). The advantage of using a graph-form representation for ACDs is that we can compute the distance or similarity coefficient between any two words from a minor lexical dataset based on the degree (the number of links held by one vertex), the degree distribution (the probability distribution of the degrees over a graph), or the shortest path information specific to a complex network (minimum number of steps from one vertex to another).

In this article, we propose a new similarity index that is indicative of various characteristics of semantic networks, regardless of size and complexity. Furthermore, the semantic space formed by applying this similarity index to word association norms might be different from those based on co-occurrence pattern information derived from the usual lexical corpora. The n-grams extracted from a web document collection could effectively simulate the fMRI neural data from a property generation task performed on word stimuli. It is also important to determine whether semantic network information given by applying graph theory to ACDs would be effective in predicting the activity of the human brain.

Tapping into the other paradigm of complex networks, we propose an original use for neuroimaging studies using fMRI. Previously, functional connectivity MRI (fcMRI) [32–43] has been employed as an intriguing technique for uncovering chains of voxels (pixels with volume as units of neuro-imaging data) that simultaneously fire under particular task-driven or resting conditions. As a variant of fcMRI, we describe a system of informative voxels as vertices within a neural circuit that is correlated with semantic network information derived from a dataset of word association norms.

## Materials and Methods

### Definition of MiF

In this section, we introduce the Markov-inverse-F measure (MiF), a new definition of distance on a graph. MiF improves the conventional Jaccard and Simpson indices, and reconciles both the geodesic information (random walk) and co-occurrence adjustment (degree balance and correlation).

To give the co-occurrence adjustment, it is known that the Jaccard similarity can be intuitively formulated as

$$\frac{|A \cap B|}{|A \cup B|} \tag{1}$$

for two sets  $A$  and  $B$ . Indeed, for two vertices, this index is usually computed as

$$\frac{|N(a) \cap N(b)|}{|N(a) \cup N(b)|}, \tag{1}'$$

where  $N(a)$  denotes the set of all neighbours of vertex  $a$ . To enhance the accuracy with which the distance between remote nodes is evaluated, we extend the interpretation of expression (1) such that the numerator is the distance of the shortest path connecting vertices  $a$  and  $b$ . The denominator in (1) is the sum of the degrees of vertices  $a$  and  $b$ , or, in some cases, all of the steps starting from these vertices that have an identical step length. In this article, we adopt the latter definition for the denominator, and set the step length equal to the shortest path between  $a$  and  $b$  in the numerator. Fig 1 illustrates this coefficient using the friendship network of Zachary’s famous “Karate Club” [44].

Certain disadvantages of the Jaccard similarity have been described. For example, it can produce values that are too small and not intuitively plausible. This is because the denominator for normalisation, i.e. the cardinality of the union of two sets, is often too large [45–46]. To compensate for this perceived weakness, the Simpson index was introduced. Given by

$$\frac{|A \cap B|}{\text{Min}(|A|, |B|)}, \tag{2}$$

this index tends to return a larger similarity score for connections with a small-degree vertex,

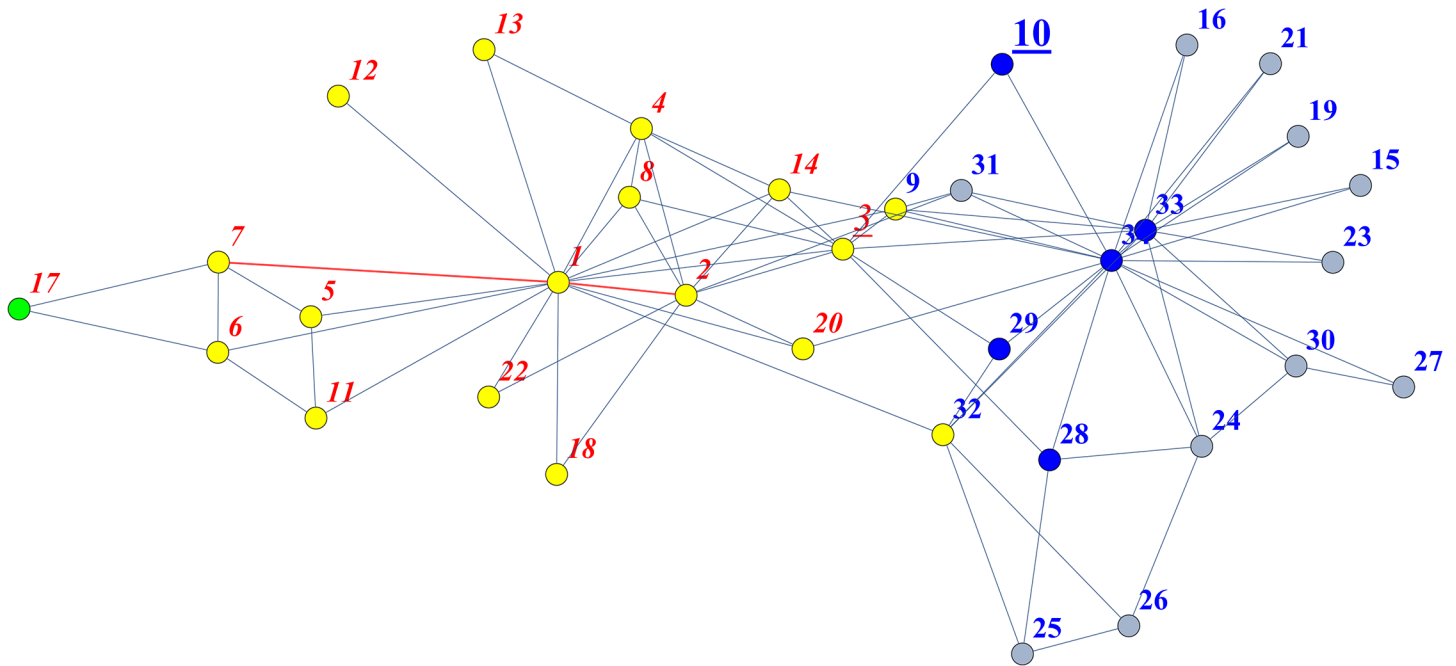

**Fig 1. Friendship network of Zachary's famous "Karate Club".** There is one shortest path between vertices 2 and 7 (red edges), with a step length of 2. It follows from the sum of the elements in the second and seventh rows (or columns) of the second power of the adjacency matrix that there are 52 and 25 two-step paths starting from vertices 2 and 7, respectively. Thus, the Jaccard similarity between them is calculated as  $(52+25)^{-1} = 0.012987$ , if we take into account all of the steps starting from each of the two vertices that have a step length of 2. In this figure, the yellow nodes are reachable in two steps from both vertices 2 and 7, whereas, under the same path condition, the blue nodes can only be reached from vertex 2, and the green node can only be reached from vertex 7. In addition, these two vertices have a Simpson coefficient of  $25^{-1} = 0.04$  and a MiF value of the 0.0185583. It is widely known that the friendship network among the Karate club members was split into two factions. According to the degree to which the final attachments to each faction match with the results of graph clustering, it is possible to evaluate the effectiveness of the clustering technique (based on an adjacency matrix) for simulating the social relationships. The two factions are represented here by the vertex labels with red italic font (one group composed of vertices {1, 2, 3, 4, 5, 6, 7, 8, 11, 12, 13, 14, 17, 18, 20, 22}) and those with blue bold font (the other group of {9, 10, 15, 16, 19, 21, 23, 24, 25, 26, 27, 28, 29, 30, 31, 32, 33, 34}). Misclassification always occurred by binding vertices 3 and 10 at early stages when the Jaccard index, Simpson index, and MiF with the default  $\beta$  value (0.5) were applied to the hierarchical graph clustering of this network. With a small value of  $\beta$  (for example, 0.01), which can reflect the asymmetrical roles played by the two agents in terms of connectivity, MiF predicts the composition of the two factions with 100% accuracy. For further details, see [S2 Program](#). This figure was created using Mathematica 8.

doi:10.1371/journal.pone.0125725.g001

which would bias the degree imbalance of the two vertices of interest. In (2),  $|A|$  and  $|B|$  represent the number of paths starting from vertices  $a$  and  $b$ , respectively. Note that the step length for  $|A|$  and  $|B|$  in the denominator of (2) is the same as that for the numerator, namely, the shortest path between the two nodes.

Inspired by the Simpson index, we generalise this to reflect multiple features of a network. Our idea consists of modifying the denominator using the weighted harmonic mean

$$H_{\beta}(a, b) = \frac{1}{\frac{1-\beta}{a} + \frac{\beta}{b}} = \frac{ab}{\beta a + (1-\beta)b} \tag{3}$$

of all  $i$ -step paths leaving the two vertices. Our new distance for two sets  $A$  and  $B$  is then

$$\frac{|A \cap B|}{H_{\beta}(|A|, |B|)} \tag{4}$$

Thus, the weight of the free parameter  $0 < \beta < 1$  enables the flexible adjustment of the magnitude of the denominator in a similar manner to the F-measure (in the field of information retrieval for making trade-offs between recall and precision). By this means, our graph index can

reflect the value of the degree correlation [47–49], which might be important for some network settings, especially in weighting the vertices. For example, when there is no degree correlation, as in the Barabási-Albert model, we could assign a significantly high (or low)  $\beta$ -value to vertices with particularly high (or low) degrees. Adjusting  $\beta$  has a significant effect on the results of simulations such as graph clustering. With a small  $\beta$  (for example, 0.01), MiF enables us to attain perfect accuracy when applied with Ward’s minimum variance dissimilarity to simulate the fragmentation of the famous Karate Club. In contrast, the Jaccard index, Simpson index, and MiF with the default  $\beta$  value (0.5) all fail to correctly assess the affiliation of a specific vertex. Further details are provided in Fig 1.

In addition to evaluating the co-occurrence information, our method takes into account the geodesic-based idea of a random walk [50–51]. Between vertices  $x$  and  $y$ , it is natural to consider that a greater number of connecting paths indicates a closer relationship in the graph. However, the number of shortest path lengths greater than one step, or that of bypasses including redundant loops, can be an important factor [21, 52–54] if the other weight parameter is configured for the path steps of a random walker on a graph. The values of this parameter for  $i$ -steps,  $\alpha_i$ , should decrease with similarity in accordance with the procession of a random walk.

This combination of a random walk transition (Markov process) on a graph and a harmonic mean for information retrieval explains the name of our new similarity coefficient, the Markov-inverse-F Measure, or MiF.

We now present some notation and definitions that we use to describe a complex network:

$A$ : an  $m \times m$  adjacency matrix for a graph having  $m$  vertices,

$A_{x,y}$ : the  $(x, y)$ -th element of  $A$ ,

$A^p_{x,y}$ : the  $(x, y)$ -th element of the path matrix  $A^p$ ,

$S^{(i)}_{x,y} = A^i_{x,y}$ : the number of paths (routes) connecting vertices  $x$  and  $y$  with  $i$  steps,

$P_x^{(i)} = \sum_{c=1}^m A^i_{x,c}$ : the number of paths (routes) starting from vertex  $x$  that have a length of  $i$  steps.

Regarding  $\alpha_i$ , we implement the constraints

$$0 < \alpha_i < 1, \alpha_1 > \alpha_2 > \dots, \sum_{i=1}^{\gamma} \alpha_i = 1 \tag{5}$$

for the scaling between 0 and 1 to be imposed to MiF, as the values of this parameter are reduced with an increase in path steps. Let  $\gamma$  denote a small integer delimiting the maximum number of steps  $i$ . This can be determined by the extent of *small-worldness* [18], and is usually less than around ten for a graph built on a language corpus (cf. [17]: the maximum average shortest path length recorded in WordNet is 10.56). Values of  $\alpha_i$  can be provided empirically by the following reference coefficient list, whose number of elements is set to this provisory limit.

Given

$$c = \{1., 1.61803, 1.83929, 1.92756, 1.96595, 1.98358, 1.99196, 1.99603, 1.99803, 1.99902\}$$

as the maximum real roots of  $\sum_{i=1}^k \left(\frac{1}{x}\right)^i = 1$  for all integers  $k$  ( $0 < k \leq 10$ ), the expressions  $\alpha_i = c(\gamma)^{-i}$  and (5) always hold. For instance, with  $\gamma = 2$  as the maximum step length, we have:

$$\sum_{i=1}^{\gamma} \alpha_i = \sum_{i=1}^2 c(2)^{-i} = 1.61803^{-1} + 1.61803^{-2} = 1;$$

with  $\gamma = 4$ :

$$\sum_{i=1}^{\gamma} \alpha_i = \sum_{i=1}^4 c(4)^{-i} = 1.92756^{-1} + 1.92756^{-2} + 1.92756^{-3} + 1.92756^{-4} = 1,$$

and with  $\gamma = 10$ ,

$$\begin{aligned} \sum_{i=1}^{\gamma} \alpha_i &= \sum_{i=1}^{10} c(10)^{-i} = 1.99902^{-1} + 1.99902^{-2} + 1.99902^{-3} + 1.99902^{-4} + 1.99902^{-5} \\ &\quad + 1.99902^{-6} + 1.99902^{-7} + 1.99902^{-8} + 1.99902^{-9} + 1.99902^{-10} = 1 \end{aligned}$$

In addition, a constant value  $\beta$ , where  $0 < \beta < 1$ , is given to define the weighted harmonic mean in (4). For the purpose of illustration, we set  $\beta = 0.5$  as the default for treating all vertices with equal weight. Based on these parameters, MiF is formulated as

$$\begin{aligned} D_{xy} &= \sum_{i=1}^{\gamma} \frac{\alpha_i S_{x,y}^{(i)}}{H_{\beta}(P_x^{(i)}, P_y^{(i)})} = \sum_{i=1}^{\gamma} \frac{\alpha_i S_{x,y}^{(i)} (\beta P_x^{(i)} + (1 - \beta) P_y^{(i)})}{P_x^{(i)} P_y^{(i)}} \\ &= \sum_{i=1}^{\gamma} \frac{\alpha_i A_{x,y}^i (\beta \sum_{c=1}^m A_{x,c}^i + (1 - \beta) \sum_{c=1}^m A_{y,c}^i)}{\sum_{c=1}^m A_{x,c}^i \sum_{c=1}^m A_{y,c}^i} \end{aligned} \tag{6}$$

It can be ascertained that  $0 \leq D_{xy} < 1$  is true in any case. [S1 Program](#) implements functions for computing the MiF, Jaccard, and Simpson coefficients between any vertices in a network whose adjacency matrix is provided as a sparse array.

### Application of MiF

As noted in the Introduction, ACDs contain word-pair data obtained from psychological experiments in which the participants are typically asked to provide a semantically related response word that comes to mind when presented with a stimulus word. The Edinburgh Word Association Thesaurus of English (EAT, [1]) is a typical English-language ACD, and is well-balanced though small in size (approximately 3 MB). The characteristic aspect of this database is that word association norms were collected by growing the network from a nucleus of words to obtain further responses. Such a chain association gave rise to linkages among seemingly unrelated words with diverse semantic relationships.

In this research, we extract a subgraph from the EAT that connects all 60 nouns used as stimulus items in the fMRI experiments of Mitchell et al. [26] (Fig 2). These fMRI nouns are classified into 12 semantic categories (animals, body parts, buildings, building parts, clothing, furniture, insects, kitchen items, tools, vegetables, vehicles, and other man-made items), each including five nouns. EAT contains all of these fMRI nouns, except ‘CELERY’ and ‘REFRIGERATOR’, so ‘CABBAGE’ and ‘FRIDGE’ are instead selected as synonyms for these absent nouns. This non-directed and non-weighted subgraph (see [S1](#) and [S2](#) Datasets) has 2768 vertices (60 fMRI nouns plus 2708 in-between words), a connection rate of 0.005, mean degree of 7.23, and clustering coefficient of 0.042. The maximum and mean shortest path lengths between the fMRI nouns and the in-between words are 6 (so we set  $\gamma = 6$ ) and 4.09, respectively. The degree distribution follows a clear power law (or, more specifically, Zipf’s law) [20,17].

For our computational neurolinguistics modelling, we applied our MiF Mathematica program (see [S1 Program](#)) with  $\beta = 0.5$  and  $\gamma = 6$  as the maximum shortest path length to the

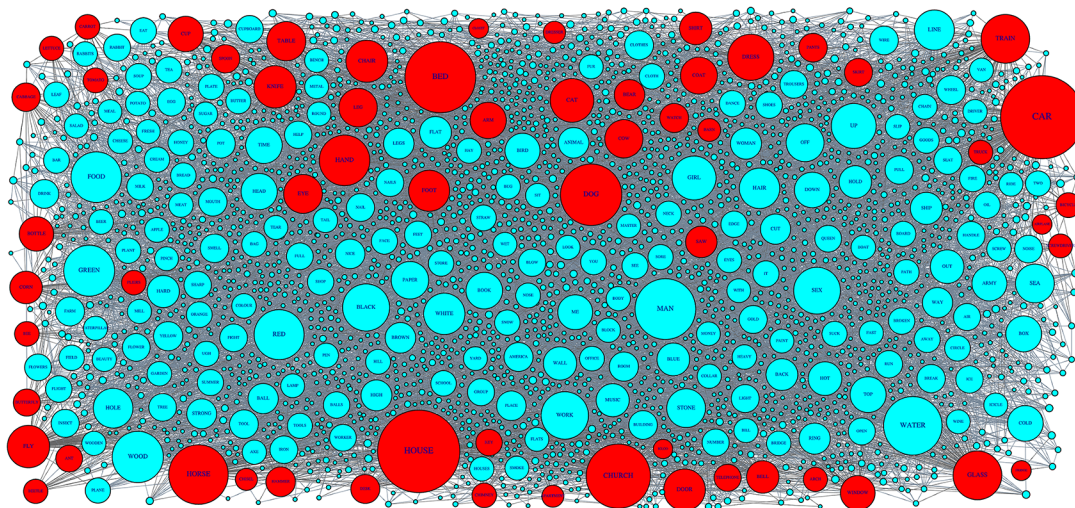

**Fig 2. EAT subgraph around the lexical stimuli used in by Mitchell et al.** This graph is composed of the 60 fMRI nouns used by Mitchell et al. [26] (red circles) and the 2708 in-between words (blue circles) linking them on the shortest path routes in the EAT semantic network. The magnitude of the radius for each vertex corresponds to the degree value. This visualisation was made with R using the igraph package.

doi:10.1371/journal.pone.0125725.g002

subgraph described above. We then measured the distance between each of the 60 fMRI target nouns and the 836 in-between words with degree greater than 5. This threshold was conveniently set for exemplary purposes, taking into account the importance of the words. Further, using the ‘princomp2.R’ routine (<http://aoki2.si.gunma-u.ac.jp/R/src/princomp2.R>), we ran a principal component analysis (PCA) on the  $60 \times 836$  MiF-based distance matrix (S3 Dataset). This R function enables the PCA of a data matrix in which the column dimension is greater than the row dimension. Sixty principal components were extracted, and a  $60 \times 60$  PC-score matrix representing the essential information about a partial semantic network of EAT was formed.

All the principal components extracted from the MiF-based distance matrix are identified by the short-hand notation ‘MiF-PC’, with a number in descending order of eigenvalues. Because each MiF-PC is a complex, multifaceted semantic entity, it would be difficult (besides a few exceptions, such as PC3 signifying “sex”) to unify all possible interpretations under a single heading. Thus, we instead give certain statistical information. For instance, the combination of the most contributory fMRI noun with the largest principal component score is enclosed in single quotation marks, and the most constitutive semantic features with the largest principal component loadings are written in italic font (e.g. MiF-PC1: ‘train’-*RAIL-TRAVEL-OMNI-BUS-ENGINE-BUS*. . .). Detailed information about the MiF-PCs derived from EAT can be found in the S1 Table.

## Evaluation of MiF

It is worth noting that the semantic space underlying the 60 fMRI nouns of Mitchell et al. reflects some conceptual relationships suited to word association when using MiF applied to EAT. Fig 3 shows the results of multi-dimensional scaling (MDS) applied to the  $60 \times 60$  MiF-EAT PC-score matrix and the  $60 \times 25$  co-occurrence probability matrix of Mitchell et al.’s original model computed from the Google Web 1T 5-gram Collection. In MDS, each of the fMRI nouns is assigned coordinates in each dimension of the between-object distance matrix, showing the level of similarity. Some words belonging to different semantic categories become close to each other, and this closeness can be interpreted as a type of derived *metonymic*

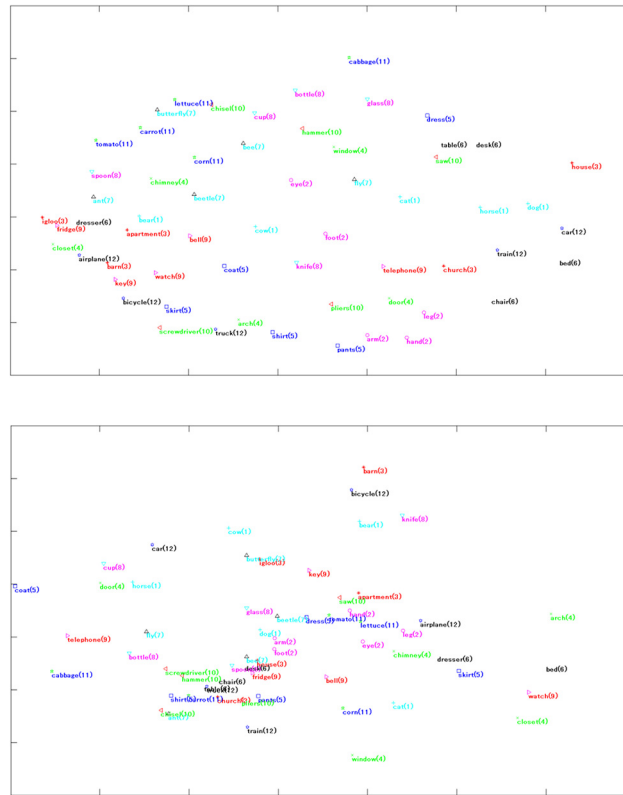

**Fig 3. MDS results for the two distance matrices on the 60 fMRI nouns.** We compared the PC-score matrix of MiF-EAT (top) with the co-occurrence matrix of Mitchell et al.’s model from the Google Web 1T 5-gram collection (bottom). The natural numbers attached to the nouns represent the semantic categories (animals: cyan-(1), body parts: magenta-(2), buildings: red-(3), building parts: green-(4), clothing: blue-(5), furniture: black-(6), insects: cyan-(7), kitchen items: magenta-(8), man-made objects: red-(9), tools: green-(10), vegetables: blue-(11), and vehicles: black-(12)). The computation and visualisation were made using Statistics Toolbox and Matlab.

doi:10.1371/journal.pone.0125725.g003

relationship. Contiguity (‘apartment’ and ‘bell’), target objects (‘key’ for ‘barn’ and ‘apartment’), intended or unintended uses (‘pants’ and ‘arm’, ‘hand’, ‘leg’, ‘window’ and ‘hammer’), mediated associations (‘igloo’ and ‘fridge’ through ‘cold’ or ‘icy’), and so on can be retrospectively construed as reasons for affinity (even a lexical association at the level of collocation (‘cup’-‘chisel’) might be produced *ex-post facto*). As for the MDS map representing the co-occurrence matrix between the nouns and the 25 basic verbs for the original Mitchell et al. model, some categories (body parts, tools) have a tendency to conglomerate at the centre, and metonymic *ex-post* interpretation was not as easy on the periphery as the MDS map for MiF-EAT lexical information.

In light of the original modelling of Mitchell et al., this MiF-based association matrix played the role of  $f_i(w)$  in the following expression, proposed by [26]:

$$y_v = \sum_{i=1}^n c_{vi} f_i(w), \tag{7}$$

that is, a matrix recording the value of the  $i^{\text{th}}$  intermediate semantic feature (in our case, principal component) for word  $w$ . We adopted the distance information matrix instead of using the normalised co-occurrence frequency of the stimulus noun with each of 25 basic verbs, because



Mitchell et al. used a text corpus consisting of over a trillion tokens (<http://www.cs.cmu.edu/~tom/science2008/semanticFeatureVectors.html>).

For the other terms in (7),  $y_v$ , the predicted activation at voxel  $v$  for word  $w$ , was taken from the fMRI datasets obtained by Mitchell et al. from nine participants (<http://www.cs.cmu.edu/afs/cs/project/theo-73/www/science2008/data.html>). In this experiment, nine participants (P1–P9) were requested to execute a property generation task for each of 60 nouns (with a 3 s stimulus period), and then rest for a period of 7 s with a fixation mark. fMRI scans were performed using an echo planar imaging sequence with a 1000 ms repetition time, and for six different stimuli presentation orders.

The scalar parameter  $c_{vi}$  was computed by the algorithm of Mitchell et al. For the details on the experimental settings, we fundamentally adhered to Mitchell et al., using the stability score over the runs for each voxel to select 500 features (top voxels) and the leave-two-out cross-validation procedure for the machine learning. For each participant's fMRI dataset, the leave-two-out procedure was iterated  $60! / (59! \times 2!) = 1770$  times, leaving out each of the possible word pairs for testing. Each item pair for evaluation was used to compute the cosine similarity between the predicted and actual fMRI scans. The expected accuracy in matching the two left-out words to their left-out fMRI images is 0.50 if the matching is performed at chance levels. According to the permutation test of Mitchell et al., observing an accuracy of 0.62 or higher for the within-subject decoding would be statistically significant at  $P < 10^{-11}$ .

## Results and Discussion

### Methodological comparison

We applied MiF to the EAT subgraph, and adopted the stability score to construct graph-based models from Mitchell et al.'s fMRI datasets. The precision of our decoding models was P1: 0.85, P2: 0.79, P3: 0.78, P4: 0.68, P5: 0.89, P6: 0.74, P7: 0.78, P8: 0.75, and P9: 0.76 (mean: 0.78). The corresponding results with the 60 principal components were P1: 0.87, P2: 0.75, P3: 0.76, P4: 0.66, P5: 0.89, P6: 0.72, P7: 0.76, P8: 0.70, and P9: 0.69 (mean: 0.76). The original Mitchell et al. study recorded accuracies of P1: 0.81, P2: 0.74, P3: 0.76, P4: 0.69, P5: 0.81, P6: 0.79, P7: 0.74, P8: 0.76, and P9: 0.82 (mean: 0.77). We also computed predictive models with 60 principal components extracted from the distance matrix using the inverse shortest path step lengths (mean: 0.72), Jaccard index (mean: 0.74), and Simpson index (mean: 0.75) considering the geodesic information between nodes. A non-parametric Wilcoxon signed rank test was performed between the MiF modelling result and the closest one based on the Simpson index, both with 60 principal components. The difference was found to be highly significant ( $p = 7.6600e-04$ ), and MiF outperformed the other graph similarity coefficients. Figs 4 and 5 compare the participant-wise decoding accuracy and the mean discrimination accuracy of the two MiF-based EAT analysis models, inverse shortest path step lengths, Jaccard/Simpson indices for subsequent PCA, and the replicated Mitchell et al. results with the Google 5-grams Collection. Fig 6 represents an item-wise confusion matrix generated as a result of cross-validating our decoding model trained with the 60 MiF-based principal components and averaged over all nine participants. The precision in discriminating nouns is generally good, despite a slight penalty in the within-category comparisons and the cross-category ones involving the nouns of man-made objects.

The advantage of MiF as a graph-based similarity coefficient lies in certain characteristic traits, which we now discuss. This graph-theoretical method integrates both *geodesic knowledge* (given by a random walk) and a *strength relationship* (expressed by the degree balance) from a complex network into a convenient mathematical formula. It assimilates fine-grained information about the mutual relationship between nodes, and is effectively a medium for a two-fold

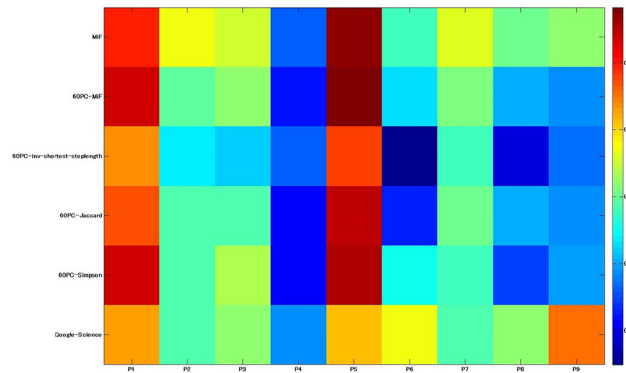

**Fig 4. Heatmap representing the subject-wise decoding accuracy.** This result was obtained under the two MiF-EAT conditions (836 words and 60 principal components), inverse shortest path step lengths, Jaccard/Simpson indices for subsequent PCA, and the replicated results of the Google-Science paper research of Mitchell et al.[26].

doi:10.1371/journal.pone.0125725.g004

distributional representation of conceptual processing. The significance of MiF is underscored in terms of its predictive modelling ability across multiple research domains. A semantic network extracted from a database of word association norms (ACD) might reflect, and indeed track, the intellectual process through which corpus data grow in a chain association from a nucleus set of words. Through the intermediate semantic features shared by words in the ACD semantic network, MiF provides a good weight matrix for predicting the fMRI brain activity that might partially represent this intellectual process in another psychological experiment.

### MiF-based neuro-computational networks

Thus far, we have considered a graph-theoretical analysis through a similarity metric applied to word association norms as a source of lexical co-occurrence networks. As such, this metric might indeed be circumscribed to the semantic distance between words at the ACD level. However, an approach whereby connectivity information could be mathematically formalised may also be effective for deriving components (as neural correlates) from the patterns of fMRI signal changes detected during the processing of word senses.

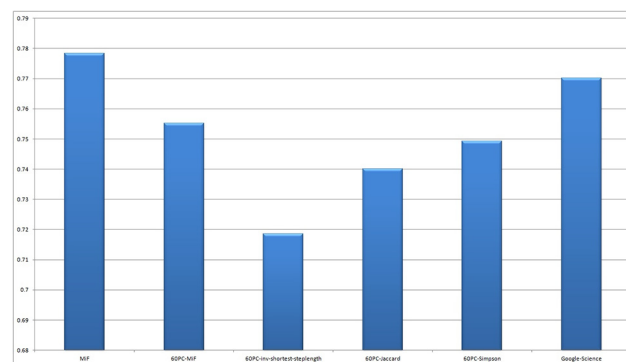

**Fig 5. Mean discrimination accuracies obtained from the participants of Mitchell et al.'s research [26].** These results were obtained under the two MiF-EAT conditions (836 words and 60 principal components), inverse shortest path step lengths, Jaccard/Simpson indices for subsequent PCA, and the replicated results of the Google-Science paper research [26].

doi:10.1371/journal.pone.0125725.g005

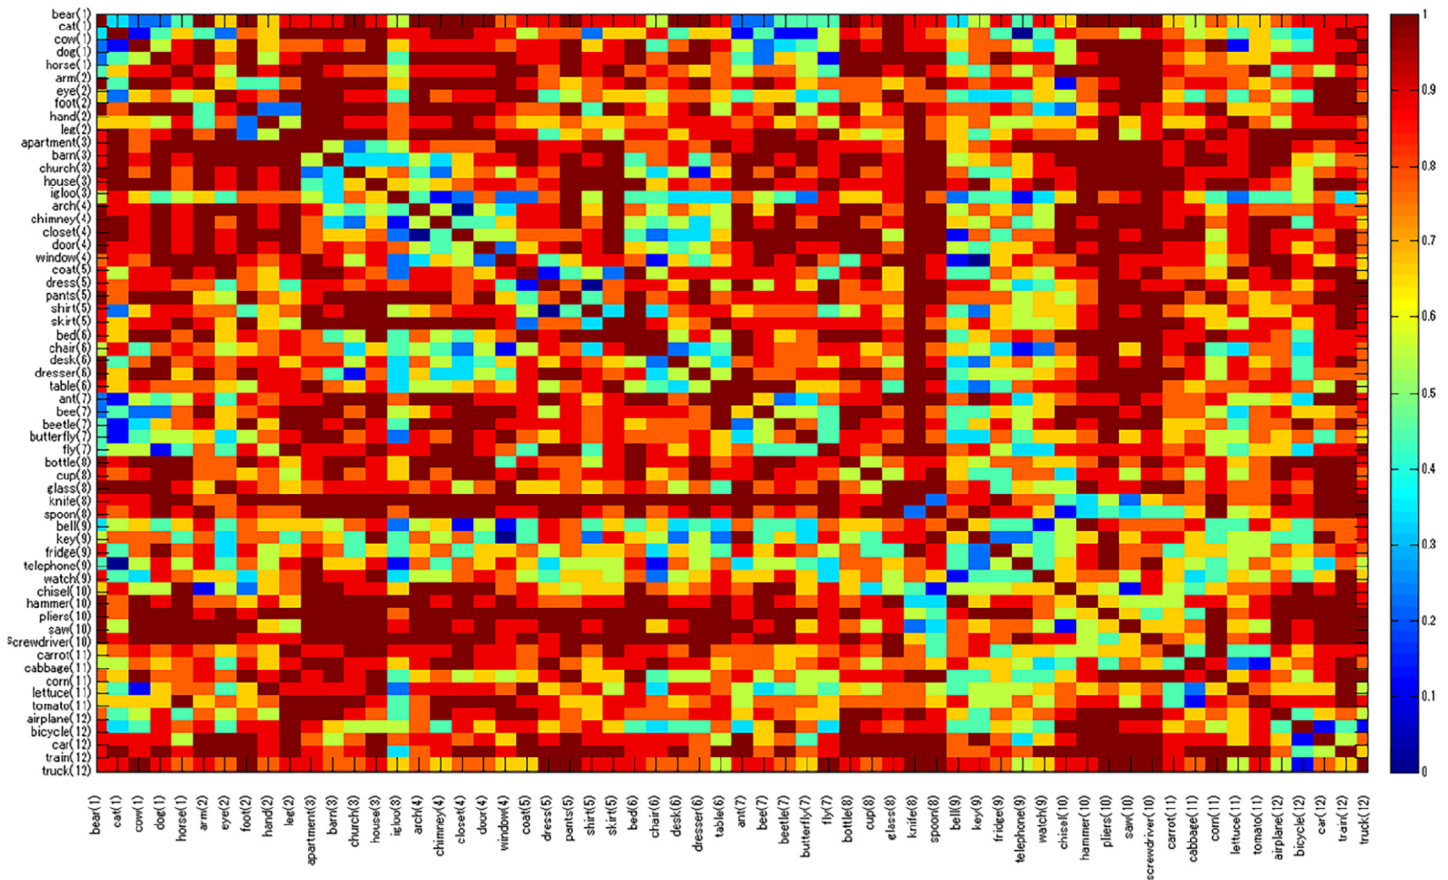

**Fig 6. Item-wise confusion matrix from the participants of Mitchell et al.’s research [26].** The result was obtained from 60 principal components of MiF-EAT and averaged over all nine participants. The point at (row  $i$ , column  $j$ ) shows the proportion of participants whose datasets allowed us to derive a correct match between the predicted noun  $i$  and the observed noun  $j$ . The number following each item name corresponds to one of these conceptual categories: (1) animals, (2) body parts, (3) buildings, (4) building parts, (5) clothing, (6) furniture, (7) insects, (8) kitchen items, (9) man-made objects, (10) tools, (11) vegetables, and (12) vehicles.

doi:10.1371/journal.pone.0125725.g006

This valuable insight prompts us to envision another graph-form for information in brain regions that are supposed to serve the process of conceptual association. Further details concerning this methodology, partly inspired by the ideas of fcMRI [32–43], are fully demonstrated in the [S1 Text](#). To integrate these linguistic and physiological networks, we correlate *selected features* in the machine learning of fMRI signals (known as multi-voxel pattern analysis or MVPA, see [26, 31, 55–65]) to *semantic features* for fMRI stimulus nouns, which are treated as objects of natural language processing.

This modelling involves detecting, with respect to these nouns, a subset of informative voxels (as “*neuro-anatomical features*”) that elicit a neural activation pattern that is significantly homologous to each MiF principal component vector (derived as “*lexico-semantic features*”). We set a threshold for the pairwise Pearson correlations between these two features at 0.330104 ( $p < 0.01$ ) in accord with the no-correlation test for a dimension size of 60 (equal to the number of fMRI stimulus nouns), and created a participant-wise bipartite graph between MiF principal components and important voxels (see [S1 Text](#), Section I and [S1 Fig](#)). Our discussion here is confined to the theoretical implications of superimposing these separate feature layers in the context of *computational neurolinguistics*.

We address the issue of whether and how such a twofold modelling can incorporate aspects of *distributional representations* in a paradigm of network connectivity. The distributional representation implies the following propositions in different rubrics: the meaning of a word is defined as a set of properties or features specified in various views and contexts (see literature reviews in [66–70]); activation, even by thinking of a single word, is scattered across the whole brain [22, 25, 30–31].

Fig 7 shows an example mapping for two circuits (or contexts) in parallel, i.e. conceptual relatedness with extending scope or growing complexity, and unexpectedly widespread fMRI responses to a lexical task, both associated with the nouns ‘bed’ and ‘hand’ (representative words for MiF-PC3: ‘bed’-*HARD-SLEEVE-FINGER-SEX-LINING*. . . and MiF-PC18: ‘hand’-*CAP--BAG-SHOPPING BAG-WAVE-EXCHANGE*. . .). Instead of determining some categorically-classified semantic atlas on the cortex (like “*furniture*” for ‘bed’ and “*body parts*” for ‘hand’), we generate a binding of informative voxels as a “*neural context*” (similar to a “*semantic space*” [71]), which serves as a counterpart to a lexical mapping of a key noun together with its semantic features. Note that all of these words are treated via fine-grained serial information as freely associated concepts under MiF-based principal components (extended to connotations such as sex, motions, and hand-carried goods; see the third column of S1 Table) that are intricate, context-sensitive, and in some way systematic.

Although the free association norms gathered in a thesaurus reflect the social, cultural, and linguistic backgrounds of the informants who contributed to the data collections [12], the consequent attenuation of individual traits is a common and ineluctable process in data compilation. However, our modelling of double-articulated components enables us to extract individual variability (or, as it were, idiosyncrasies in fMRI responses) from such a synthesised and averaged dictionary, through the biased correlation between MiF-PCs and relevant informative voxels. For example, in the case of P1, we can recognise a sort of *signature pattern* in that 46.2% of feature-voxels (161 out of 348, see the first column of S2 Table) form a wide range of neural context exclusively mediated by MiF-PC3, which is biased towards various sexual implications.

Individuals differ markedly in terms of the location of voxels sensitive to each MiF-PC. It is worth noting that some neural contexts, such as the voxels taken from P4 corresponding to MiF-PC3 (and P8 sensitive to MiF-PC44, see S1 Text, Section II with S4 Fig), can be interpreted by *simulation semantics* [72–76], which is a field of linguistics embodiment theory [77–88]. An intriguing consistency emerges, if only partially, between *areas* and *meanings*, with a relationship prescribed as *somatomotor* or *somatosensory* in the literature of functional anatomy. In fact, P4’s voxels related to MiF-PC3 show that, as if connoting some rehearsal of previous tangible (perceptual-motor) experiences, the Left Precentral, Left Superior Frontal Lobe, Left Supplementary Motor Area, Left Inferior Parietal Lobe, etc., are coupled with some of the most constitutive semantic features with the largest principal component loadings, such as “*HARD*”, “*SLEEVE*”, “*FINGER*”, “*SEX*”, “*FEET*”, “*BODY*”, “*REACH*”, and “*WRIST*”.

However, as such a finding is somewhat narrow, our modelling must be considered as no more than preliminary; delineating an exact parallel map between a neural circuit and semantic network remains a task for future research, at least for a robust signature of an individual subject. We are not yet in a position to introduce any full-fledged *hodological* view into a semantico-anatomical distributional representation in the context of computational neurolinguistics. Similarly, we cannot argue that, for instance, expanding conceptual associations could gain contiguous neural resources as a clearly articulated counterpart. The overlaid components based on our fcMRI-like modelling merely create a chain of fully connected complete graphs on the neural side. Whether already-known anatomical networks underlie the neural contexts that bundle selected voxels that are sensitive to particular concepts remains an open question.

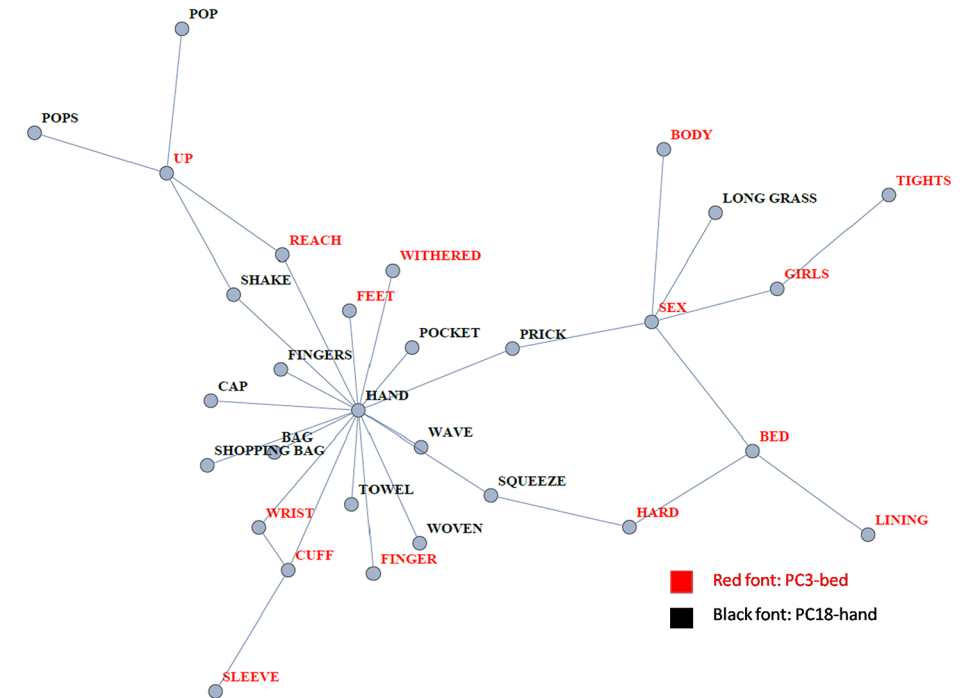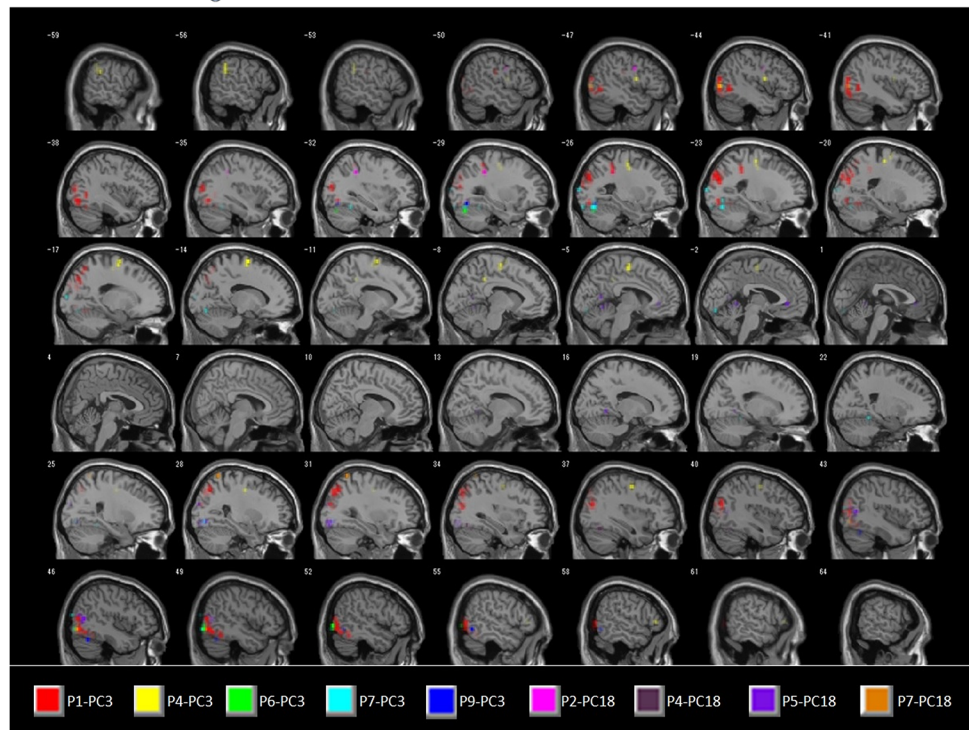

**Fig 7. Example of conceptual association overlaid on brain images representing its neural context.** Top: lexical adjacency graph extracted from the semantic network of EAT (Fig 2). This represents MiF Principal Components (MiF-PCs) 3 (red labels) and 18 (black labels) with the fMRI nouns having the largest principal component scores (“bed” and “hand”, respectively) and the top twenty semantic features recording the largest principal component loading values. Most notably, the second fMRI noun for MiF-PC3 with the most sex-related connotation is also “hand”, so the graph shares various semantic contexts pertaining to this effector (body, sex, motions, and hand-carried goods). Bottom: anatomical location of the feature voxels selected from each participant of Mitchell et al. [26] as neural contexts corresponding to those two MiF-PCs. For example, “P1-PC3” denotes feature voxels from the P1 dataset that have neural activation patterns significantly homologous to the principal component vector of MiF-PC3 with respect to the 60 nouns used in

the fMRI experiment. These sagittal brain images were smoothed using SPM8 with the full-width at half maximum parameter [3 3 3] to enhance visual effects. The Supporting Information and its figures clarify how to couple a neural component and an MiF-PC using an original fcMRI method applied to this *semantic-neural* paradigm.

doi:10.1371/journal.pone.0125725.g007

However, the results shown in the Supporting Information demonstrate that the most-watched fcMRI anatomical areas frequently emerge in neural contexts, such as the Extrastriate Cortex with Fusiform, Middle Occipital Gyrus, Lingual, and Precuneus (see [S1 Text](#), [S2](#), [S3](#) and [S5 Figs](#)) [89].

## Conclusions

In this article, we have proposed a novel distance definition for a graph. This Markov-inverse-F measure (MiF) exploits both geodesic information and the co-occurrence adjustment. By applying our new similarity coefficient to complex networks built from word association norms (EAT), we created a set of intermediate semantic features and their coupling weights for predicting the neural responses to words. In spite of a size constraint, our MiF-based decoding model allowed us to predict, in the wake of Mitchell et al. [26], but using conceptual associations with various interpretations, the neural response to each unknown word with better predictive accuracy than other decoding models based on conventional similarity coefficients.

Moreover, those voxels most responsive to a particular concept were extracted as members of a neural context by leveraging a basic idea of fcMRI. We briefly described the formation of this neural context in terms of the MiF-based principal components as the most overarching and informative semantic features. Although, at the single subject level, we found some cases that seem to embody the physiological process of cognition, large individual differences were observed in the location and scope of neural contexts as a modality of distributional representation. Further challenges will aim to elucidate the mutual relationship between semantic and neural networks as two layers in a globally unified space of computational neurolinguistics.

## Supporting Information

### S1 Text. Details on MiF-based neuro-computational networks.

(DOCX)

**S1 Fig. Nine bipartite graphs between the 59 MiF principal components and the 500 selected voxels.** These graphs were obtained for participants P1–P9 of Mitchell et al. [26] between i) the corpus-related set of 59 MiF principal components (numbered circles on the left) from the EAT dataset, and ii) the participant-wise brain-related set of 500 top voxels (feature voxels) selected by ANOVA (circles on the right), both in terms of the 60 nouns used as stimulus items in the fMRI experiments. Nodes on either side with  $r$  values greater than 0.330104 are connected. This figure was created using Mathematica 8. We can see that some MiF-PC hubs are linked to many selected voxels, but the pattern is different for each participant. For example, 46.2% of the feature voxels collected from P1 form a wide range of neural context exclusively mediated by MiF-PC3.

(TIF)

**S2 Fig. Semantic adjacency graphs (top) corresponding to the largest neural contexts (bottom).** These contexts were built from the P1–P9 datasets of Mitchell et al. [26]. Isolated nodes have been removed. The series of sagittal slices for mapping the feature voxels of the largest neural context in the standard brain was smoothed using SPM8 with the full-width at half maximum parameter of [3 3 3] to enhance visual effects. We can see that the core neural contexts

(largest components) tend to produce bead-like shapes, and encompass a wide range of areas with conspicuous variability across participants.

(TIF)

**S3 Fig. Semantic and neuro-anatomical adjacency graphs (top) and mapping of their neural contexts (bottom) from participant P2.** Components C1–C5 illustrate the conceptual relatedness within each MiF-PC and the selected feature-voxel networks that it sustains and overlays in the space of computational neurolinguistics. For the AAL notation, refer to [S3 Table](#). These neural contexts are either global bead-like networks, large but local networks, or purely local fully connected graphs. The distribution of important voxels in P2 tends to be biased toward the Extrastriate Cortex and its peripheral areas.

(TIF)

**S4 Fig. MiF-PC44 corresponding to a network in the Frontal Lobe of participant P8.**

MiF-PC44 ('bicycle'-*TWO-PEDALLER-CLIP-BRAKE-BIKE*. . .) is mainly composed of nodes located in the Frontal Lobe (such as 'Frontal\_Inf\_Tri\_L', 'Frontal\_Mid\_L', 'Frontal\_Sup\_L', 'Frontal\_Sup\_Medial\_L', and so on). Some of these voxels are extracted from regions (Brodmann areas 6, 8, and 9) connected to executive functions with visual control, which is a favourable phenomenon for simulation semantics in embodiment theory. For the AAL notation, refer to [S3 Table](#).

(TIF)

**S5 Fig. Neural contexts with multiple feature voxels mediated by MiF-PCs 3 and 18.**

MiF-PC3 represents the series ('bed'-*HARD-SLEEVE-FINGER-SEX-LINING*. . .) and MiF-PC18 denotes ('hand'-*CAP-BAG-SHOPPING BAG-WAVE-EXCHANGE*. . .). These were examined in the section on MiF-based neuro-computational networks in the main text. "Pi-PCj" denotes feature voxels in dataset *Pi* that exhibit neural activation patterns significantly homologous to the principal component vector of MiF-PCj. This figure shows adjacent clusters sharing at least one feature voxel. Other MiF-PCs adjacent to PC 3 or 18 in a participant-wise neural context are abbreviated in this figure, with the most contributive fMRI noun with the largest principal component score illustrated, such as PC6-fly. We can glimpse an interlocking scheme between conceptual association and neural response in P4-PC3, where the perceptuo-motor simulation postulated by embodiment theory (see the main text) is linked with MiF-PC59 ('closet'-*CUPBOARD-WARDROBE-SPACE-LOVE-WHITE*. . .).

(TIF)

**S1 Table. Information on MiF-PCs given by top two PC scores and top twenty PC loadings.**

This file should be used with the name "Information on MiF-PCs through the top two PC scores and the top twenty PC loadings.csv".

(CSV)

**S2 Table. Participant-wise number of feature-voxels mediated by each MiF-PC.** This file should be used with the name "Participant-wise number of feature-voxels mediated by each MiF-PC.csv".

(CSV)

**S3 Table. Abbreviations for AAL list.** This file should be used with the name "Abbreviations for AAL.csv".

(CSV)

**S1 Dataset. Adjacency matrix (under the format of *matrix market*) of EAT.** This file should be used with the name "adjacencyMatrix.mtx". Subgraph extracted from EAT for connecting

the 60 fMRI stimulus nouns used by Mitchell et al. [26].  
(MTX)

**S2 Dataset. Vertex labels of S1 Dataset.** This file should be used with the name “vertexLabels.csv”.  
(CSV)

**S3 Dataset. MiF distance matrix computed from the semantic network of EAT.** This file should be used with the name “MiFdistanceMatrix.csv”. Rows: 60 fMRI stimulus nouns; Columns: the 836 in-between words with degree greater than 5.  
(CSV)

**S1 Program. Mathematica script for the computation of MiF, Jaccard, and Simpson coefficients between any pair of vertices in a network given as a sparse array.** This file should be used with the name “MiF.m”.  
(M)

**S2 Program. Mathematica script for evaluating graph clustering results obtained from MiF with different  $\beta$  values, Jaccard, Simpson, and cosine similarity.**  
(PDF)

## Acknowledgments

We are grateful to Dr. Ken Wakita for checking our programs on complex networks and giving feedback on this research.

## Author Contributions

Analyzed the data: HA BM. Contributed reagents/materials/analysis tools: HA MM JJ BM. Wrote the paper: HA.

## References

1. Kiss GR. Words associations and networks. *Journal of Verbal Learning and Verbal Behavior*. 1968; 7: 707–13
2. Moss HE, Older LJE. *Birkbeck Word Association Norms*. Psychology Press. 1996. ISBN-13: 978–0863774041
3. Nelson DL, McEvoy CL, Dennis S. What is free association and what does it measure?. *Memory & Cognition*. 2000; 28: 887–899
4. Russell WA, Jenkins JJ. *The Complete Minnesota Norms for Responses to 100 Words from the Kent-Rosanoff Word Association Test*. 1954
5. McEvoy CL, Nelson DL. Category name and instance norms for 106 categories of various sizes. *American Journal of Psychology*. 1982; 95: 581–634
6. Meara P. *Network structures and vocabulary acquisition in a foreign language*. *Vocabulary and Applied Linguistics*. London: Macmillan. 1992; 62–72
7. Miron MS, Wolfe S. A cross-linguistic analysis of the response distributions of restricted word associations. *Journal of Verbal Learning and Verbal Behavior*. 1964; 3: 376–384. doi: [10.1016/S0022-5371\(64\)80006-2](https://doi.org/10.1016/S0022-5371(64)80006-2)
8. Nelson DL, Brooks DH. Relative effectiveness of rhymes and synonyms as retrieval cues. *Journal of Experimental Psychology*. 1974; 102: 503–507
9. Nelson DL, McEvoy CL, Schreiber TA. *The University of South Florida word association, rhyme, and word fragment norms*. 2008. <http://w3.usf.edu/FreeAssociation/>
10. Rosenzweig MR. Comparisons between French and English word association norms. *Amer. Psychologist*. 1959; 14: 363



11. Joyce T. Constructing a Large-scale Database of Japanese Word Associations, *Corpus Studies on Japanese Kanji*. Glottometrics 10. Tokyo, Japan; Hituzi Syobo and Lüdenschied, Germany: RAMVerlag. 2005; 82–98
12. Jung J, Li N, Akama H. Network Analysis of Korean Word Associations. *Proceedings of the NAACL HLT 2010 First Workshop on Computational Neurolinguistics*. 2010; 27–35
13. Miyake M, Joyce T, Jung J, Akama H. Hierarchical Structure in Semantic Networks of Japanese Word Associations. *Proceedings of the Conference of the Pacific Association for Computational Linguistics (PACLING2007)*. 2007; 321–328
14. Okamoto J, Ishizaki S. Associative concept dictionary construction and its comparison with electronic concept dictionaries. *Proceedings of the Conference of the Pacific Association for Computational Linguistics (PACLING2001)*. 2001; 214–220
15. Zock M, Bilac S. Word Lookup on the Basis of Associations: From an Idea to a Roadmap. *Proceedings of the Workshop on Enhancing and Using Electronic Dictionaries*. 2004; 29–35
16. Dorow B, Eckmann JP, Sergi D, Widdows D, Moses E, Ling K. Using Curvature and Markov Clustering in Graphs for Lexical Acquisition and Word Sense Discrimination. *MEANING-2005, 2nd Workshop organized by the MEANING Project*. 2005
17. Tenenbaum JB, Steyvers M. The large-scale Structure of Semantic Networks: Statistical Analysis and a Model of Semantic Growth. *Cognitive Science*. 2005; 29: 41–78 doi: [10.1207/s15516709cog2901\\_3](https://doi.org/10.1207/s15516709cog2901_3) PMID: [21702767](https://pubmed.ncbi.nlm.nih.gov/21702767/)
18. Watts DJ, Strogatz S. Collective dynamics of 'small-world' networks. *Nature*. 1998; 393: 440–442 PMID: [9623998](https://pubmed.ncbi.nlm.nih.gov/9623998/)
19. Ferrer i Cancho R, Solé RV. The small world of human language. *Proceedings of The Royal Society of London. Series B, Biological Sciences*. 2001; 268 (1482): 2261–2265 PMID: [11674874](https://pubmed.ncbi.nlm.nih.gov/11674874/)
20. Barabási AL, Albert R. Emergence of scaling in random networks. *Science*. 1999; 286: 509–512 PMID: [10521342](https://pubmed.ncbi.nlm.nih.gov/10521342/)
21. Steyvers M, Shiffrin RM, Nelson DL. Word association spaces for predicting semantic similarity effects in episodic memory. A. Healy (Ed.), *Experimental Cognitive Psychology and its Applications: Festschrift in Honor of Lyle Bourne, Walter Kintsch, and Thomas Landauer*. 2004
22. Akama H, Murphy B, Li N, Shimizu Y, Poesio M. Decoding Semantics across fMRI sessions with Different Stimulus Modalities: A practical MVPA Study. *frontiers in Neuroinformatics*, 2012. doi: [10.3389/fninf.2012.00024](https://doi.org/10.3389/fninf.2012.00024)
23. Allen K, Pereira F, Botvinick M, Goldberg AE. Distinguishing grammatical constructions with fMRI pattern analysis. *Brain and Language*. 2012; 123(3): 174–182 doi: [10.1016/j.bandl.2012.08.005](https://doi.org/10.1016/j.bandl.2012.08.005) PMID: [23010489](https://pubmed.ncbi.nlm.nih.gov/23010489/)
24. Anderson AJ, Tao Y, Murphy B, Poesio M. On Discriminating fMRI Representations of Abstract WordNet Taxonomic Categories. *Proceedings of the 3rd Workshop on Cognitive Aspects of the Lexicon (CogALex-III)*. COLING 2012. 2012; 21–32
25. Murphy B, Baroni M, Poesio M. EEG responds to conceptual stimuli and corpus semantics. *Proceedings of ACL/EMNLP*. 2009; 619–627
26. Mitchell T, Shinkareva S, Carlson A, Chang K, Malave V. Predicting human brain activity associated with the meanings of nouns. *Science*. 2008; 320: 1191–1195 doi: [10.1126/science.1152876](https://doi.org/10.1126/science.1152876) PMID: [18511683](https://pubmed.ncbi.nlm.nih.gov/18511683/)
27. Palatucci M, Pomerleau D, Hinton G, Mitchell T. Zero-shot learning with semantic output codes. *Advances in neural information processing systems*. 2009; 22: 1410–1418
28. Bullinaria J, Levy J. Limiting Factors for Mapping Corpus-Based Semantic Representations to Brain Activity. *PloS ONE*. 2013; 8.3: e57191 doi: [10.1371/journal.pone.0057191](https://doi.org/10.1371/journal.pone.0057191) PMID: [23526937](https://pubmed.ncbi.nlm.nih.gov/23526937/)
29. Devereux B, Kelly C, Korhonen A. Using fMRI Activation to Conceptual Stimuli to Evaluate Methods for Extracting Conceptual Representations from Corpora. *Proceedings of the NAACL HLT 2010 First Workshop on Computational Neurolinguistics*. 2010; 70–78
30. Murphy B, Talukdar P, Mitchell T. Learning Effective and Interpretable Semantic Models using Non-Negative Sparse Embedding. *COLING*. 2012
31. Pereira F, Detre G, Botvinick M. Generating text from functional brain images. *frontiers in Human Neuroscience*. 2012. doi: [10.3389/fnhum.2011.00072](https://doi.org/10.3389/fnhum.2011.00072)
32. Bullmore E, Sporns O. Complex brain networks: graph theoretical analysis of structural and functional systems. *Nat. Rev. Neurosci*. 2009; 10: 186–198 doi: [10.1038/nrn2575](https://doi.org/10.1038/nrn2575) PMID: [19190637](https://pubmed.ncbi.nlm.nih.gov/19190637/)
33. Dosenbach NUF, Fair DA, Miezin FM, Cohen AL, Wenger KK, Dosenbach RA et al. Distinct brain networks for adaptive and stable task control in humans. *PNAS*. 2007; 104: 26: 11073–11078 PMID: [17576922](https://pubmed.ncbi.nlm.nih.gov/17576922/)

34. Dosenbach NUF, Fair DA, Cohen AL, Schlaggar BL, Petersen SE. A dual-networks architecture of top-down control. *Trends Cogn Sci*. 2008 Mar; 12(3): 99–105. doi: [10.1016/j.tics.2008.01.001](https://doi.org/10.1016/j.tics.2008.01.001) PMID: [18262825](https://pubmed.ncbi.nlm.nih.gov/18262825/)
35. Eguiluz VM, Chialvo DR, Cecchi GA, Baliki M, Apkarian AV. Scale-free brain functional networks. *Phys. Rev. Lett*. 2005; 94: 018102 PMID: [15698136](https://pubmed.ncbi.nlm.nih.gov/15698136/)
36. Fair DA, Cohen AL, Power JD, Dosenbach NUF, Church JA, Miezin FM et al. Functional Brain Networks Develop from a "Local to Distributed" Organization. *PLOS Computational Biology*. 2009. doi: [10.1371/journal.pcbi.1000381](https://doi.org/10.1371/journal.pcbi.1000381)
37. Power JD, Cohen AL, Nelson SM, Wig GS, Barnes KA, Church JA et al. Functional Network Organization of the Human Brain. *Neuron*. 2011. doi: [10.1016/j.neuron.2011.09.006](https://doi.org/10.1016/j.neuron.2011.09.006)
38. Rubinov M, Sporns O. Complex network measures of brain connectivity: uses and interpretations. *Neuroimage*. 2010; 52: 1059–1069 doi: [10.1016/j.neuroimage.2009.10.003](https://doi.org/10.1016/j.neuroimage.2009.10.003) PMID: [19819337](https://pubmed.ncbi.nlm.nih.gov/19819337/)
39. Sporns O, Kotter R. Motifs in Brain Networks. *PLoS Biol*. 2004 Oct 26; 2(11): e369. doi: [10.1371/journal.pbio.0020369](https://doi.org/10.1371/journal.pbio.0020369) PMID: [15510229](https://pubmed.ncbi.nlm.nih.gov/15510229/)
40. Sporns O, Chialvo DR, Kaiser M, Hilgetag CC. Organization, development and function of complex brain networks. *TRENDS in Cognitive Sciences*. 2004; 8: 9
41. Stam CJ, Jones BF, Nolte G, Breakspear M, Scheltens P. Small-world networks and functional connectivity in Alzheimer's disease. *Cereb Cortex*. 2007; 17: 92–9 PMID: [16452642](https://pubmed.ncbi.nlm.nih.gov/16452642/)
42. Telesford QK, Morgan AR, Hayasaka S, Simpson SL, Barret W, Kraft RA, et al. Reproducibility of graph metrics in fMRI networks. *frontiers in Neuroinformatics*. 2010. doi: [10.3389/fninf.2010.00117](https://doi.org/10.3389/fninf.2010.00117)
43. Van Dijk KRA, Hedden T, Venkataraman A, Evans KC, Lazar SW, Buckner RL. Intrinsic Functional Connectivity As a Tool For Human Connectomics: Theory, Properties, and Optimization. *Journal of Neurophysiology*. 2010; 103: 1: 297–321. doi: [10.1152/jn.00783.2009](https://doi.org/10.1152/jn.00783.2009) PMID: [19889849](https://pubmed.ncbi.nlm.nih.gov/19889849/)
44. Zachary WW. An information flow model for conflict and fission in small groups. *Journal of Anthropological Research*. 1977; 33: 452–473
45. Bass JIF, Diallo A, Nelson J, Soto JM, Myers CL, Walhout AJ. Using networks to measure similarity between genes: association index selection, *Nat Methods*. 2013 Dec; 10(12): 1169–1176. doi: [10.1038/nmeth.2728](https://doi.org/10.1038/nmeth.2728) PMID: [24296474](https://pubmed.ncbi.nlm.nih.gov/24296474/)
46. Hayward PJ, Ryland JS, Taylor PD. Biology and Palaeobiology of Bryozoans. *Proceedings of the 9th International Bryozoology Conference, School of Biological Sciences, University of Wales, Swansea, 1992. International Symposium Series, 9. Olsen & Olsen: Fredensborg. 1994; ISBN 87-85215-23-6: VIII: 111*
47. Boccaletti S, Latora V, Moreno Y, Chavez M, Hwang DU. Complex networks: Structure and dynamics. *Physics Reports*. 2006; 424: 4–5: 175–308
48. Boguñá M, Pastor-Satorras R, Vespignani A. Epidemic spreading in complex networks with degree correlations. *Statistical Mechanics of Complex Networks, Lecture Notes in Physics*. 2003; 625: 127–147
49. Nikoloski Z, Deo N, Kucera L. Degree-correlation of a Scale-free Random Graph Process. *Discrete Mathematics and Theoretical Computer Science (DMTCS) proc. AE, EuroComb 2005*. 2005; 239–244
50. Malin B, Airoidi E, Carley KM. A Network Analysis Model for Disambiguation of Names in Lists. *Computational & Mathematical Organization Theory*. 2005; 11: 119–139
51. Volchenkov D, Blanchard Ph. Random walks along the streets and canals in compact cities: Spectral analysis, dynamical modularity, information, and statistical mechanics. *Physical Review E*. 2007; 75 (2): id 026104
52. Hubbell CH. An input–output approach to clique identification. *Sociometry*. 1965; 28: 377–399
53. Katz E. The Two-Step Flow of Communication: An Up-To-Date Report on a Hypothesis. *The Public Opinion Quarterly*. 1957; 21:1: 61–78
54. Leicht EA, Holme P, Newman MEJ. Vertex similarity in networks. *Physical Review E*. 2006; 73: 026120 PMID: [16605411](https://pubmed.ncbi.nlm.nih.gov/16605411/)
55. Cox DD, Savoy RL. Functional magnetic resonance imaging (fMRI) "brain reading": detecting and classifying distributed patterns of fMRI activity in human visual cortex. *Neuroimage*. 2003; 19: 261–270 PMID: [12814577](https://pubmed.ncbi.nlm.nih.gov/12814577/)
56. Davatzikos C, Ruparel K, Fan Y, Shen D, Acharyya M. Classifying spatial patterns of brain activity with machine learning methods: application to lie detection. *Neuroimage*. 2005; 28: 663–668 PMID: [16169252](https://pubmed.ncbi.nlm.nih.gov/16169252/)
57. Haynes JD, Rees G. Decoding mental states from brain activity in humans. *Nat Rev Neurosci*. 2006 Jul; 7(7): 523–34 PMID: [16791142](https://pubmed.ncbi.nlm.nih.gov/16791142/)

58. Haxby JV, Gobbini MI, Maura L, Ishai FA, Schouten JL, Pietrini P. Distributed and overlapping representations of faces and objects in ventral temporal cortex. *Science*. 2001; 293: 2425–2430 PMID: [11577229](#)
59. Kamitani Y, Tong F. Decoding the visual and subjective contents of the human brain. *Nature Neuroscience*. 2005; 8 (5): 679–685 PMID: [15852014](#)
60. LaConte S, Strother S, Cherkassky V, Anderson J, Hua X. Support vector machines for temporal classification of block design fMRI data. *Neuroimage*. 2005; 26: 317–329 PMID: [15907293](#)
61. Mourão-Miranda J, Bokde ALW, Born C, Hampel H, Stetter M. Classifying brain states and determining the discriminating activation patterns: Support Vector Machine on functional MRI data. *Neuroimage*. 2008; 28: 4: 980–995
62. Norman KA, Polyn SM, Detre GJ, Haxby JV. Beyond mind-reading: multi-voxel pattern analysis of fMRI data. *TRENDS in Cognitive Sciences*. 2006; 10: 9: 424–430 PMID: [16899397](#)
63. O'Toole AJ, Jiang F, Abdi H, Penard N, Dunlop JP, Parent MA. Theoretical, statistical, and practical perspectives on pattern-based classification approaches to the analysis of functional neuroimaging data. *Journal of Cognitive Neuroscience*. 2007; 19: 1735–1752 PMID: [17958478](#)
64. Pereira F, Mitchell T, Botvinick M. Machine learning classifiers and fMRI: a tutorial overview. *Neuroimage*. 2009. doi: [10.1016/j.neuroimage.2008.11.007](#)
65. Weil RS, Reesa G. Decoding the neural correlates of consciousness. *Current Opinion in Neurology*. 2010; 23: 649–655 doi: [10.1097/WCO.0b013e32834028c7](#) PMID: [20881487](#)
66. Baroni M, Lenci A. Distributional Memory: A general framework for corpus-based semantics. *Computational Linguistics*. 2010; 36(4): 673–721
67. Baroni M, Zamparelli R. Nouns are vectors, adjectives are matrices: Representing adjective-noun constructions in semantic space. *Proceedings of EMNLP*. 2010; 1183–1193
68. Lenci A. Distributional approaches in linguistic and cognitive research. *Italian Journal of Linguistics*, 2008; 20(1): 1–31
69. MacRae K, Cree GS, Seidenberg MS. Semantic feature production norms for a large set of living and non living things. *Behavior Research Methods*. 2005; 37: 547–559 PMID: [16629288](#)
70. Zhitomirsky-Geffet M, Dagan I. Bootstrapping distributional feature vector quality. *Computational Linguistics*. 2009; 35(3): 435–461
71. Huth AG, Nishimoto S, Vu AT, Gallant JL. A Continuous Semantic Space Describes the Representation of Thousands of Object and Action Categories across the Human Brain. *Neuron*. 2012; 76: 1210–24 doi: [10.1016/j.neuron.2012.10.014](#) PMID: [23259955](#)
72. Bergen B. Experimental methods for simulation semantics. *Methods in Cognitive Linguistics*. 2007. doi: [10.1075/hcp.18.19ber.in](#)
73. Feldman J. Simulation semantics can revitalize the formalization of meaning: Reply to comments on “Embodied language, best-fit analysis, and formal compositionality”. *Physics of Life Reviews*. 2010; 7: 4: 421–423
74. Kaschak MP, Glenberg AM. Constructing meaning: The role of affordances and grammatical constructions in sentence comprehension. *Journal of Memory and Language*. 2000; 43(3): 508–529
75. Shimizu Y, Akama, H. Simulation Semantics Based on the Subdivision of the Figures of Speech. *The Journal of Environmental and Information Studies Musashi Institute of Technology*. 2008; 73–85
76. Zwaan RA. Time in Language, Situation Models, and Mental Simulations. *Language Learning*. 2008; 58: 13–26
77. Barsalou LW, Solomon KO, Wu LL. Perceptual Simulation in Conceptual Tasks. Cultural, typological, and psychological perspectives in cognitive linguistics. *The proceedings of the 4th conference of the International Cognitive Linguistics Association*. 1999; 3: 209–228
78. Barsalou LW. Perceptual symbol systems. *Behavioural and Brain Sciences*. 1999; 22: 577–660 PMID: [11301525](#)
79. Barsalou LW. Situated simulation in the human conceptual system. *Language and Cognitive Processes*. 2003; 18: 513–562
80. Bergen B. Mental simulation in literal and Figurative language. *The Literal and Non-Literal in Language and Thought*, Peter Lang. 2005; 255–278
81. Feldman J, Narayanan S. Embodied meaning in a neural theory of language. *Brain and Language*. 2004; 89: 385–392 PMID: [15068922](#)
82. Feldman J. Embodied language, best-fit analysis, and formal compositionality. *Physics of Life*. 2010; 7: 4: 385–410 doi: [10.1016/j.pprev.2010.06.006](#) PMID: [20599445](#)

83. Glenberg AM, Kaschak MP. Grounding language in action. *Psychonomic Bulletin and Review*. 2002; 9: 558–565 PMID: [12412897](#)
84. Pulvermüller F. Brain reflections of words and their meaning. *TRENDS in Cognitive Sciences*. 2001; 5: 517–524 PMID: [11728909](#)
85. Pulvermüller F. Brain mechanisms linking language and action. *Nat Rev Neurosci* 2005; 6(7): 576–582 PMID: [15959465](#)
86. Saygin AP, McCullough S, Alac M, Emmorey K. Modulation of BOLD Response in Motion-sensitive Lateral Temporal Cortex by Real and Fictive Motion Sentences. *Journal of Cognitive Neuroscience*. 2010; 22: 11: 2480–2490 doi: [10.1162/jocn.2009.21388](#) PMID: [19925197](#)
87. Willems RM, Casasanto D. (2011) Flexibility in embodied language understanding. *Front Psychol*. 2011 Jun 3; 2: 116. doi: [10.3389/fpsyg.2011.00116.eCollection 2011](#) PMID: [21779264](#)
88. Wu LL, Barsalou LW. Perceptual simulation in conceptual combination: Evidence from property generation. *Acta Psychologica*. 2009; 132: 173–189 doi: [10.1016/j.actpsy.2009.02.002](#) PMID: [19298949](#)
89. Tzourio-Mazoyer N, Landeau B, Papathanassiou D, Crivello F, Etard O, Delcroix N, et al. Automated Anatomical Labeling of Activations in SPM Using a Macroscopic Anatomical Parcellation of the MNI MRI Single-Subject Brain. *Neuroimage*. 2002; 15: 1: 273–289 PMID: [11771995](#)
